# Supplementary material
Source: PubMed Central journal article supplement (PMC2582544)

FIG. S1. ***Gpihbp1* expression in primary cells.** Gonadal adipose tissue was harvested from male C57BL/6 mice, and then minced and digested in collagenase (5 mg/ml in PBS containing 4% BSA) for 90 min. Collagenase activity was stopped by adding 2 ml DMEM with 2% fetal bovine serum. Cells were centrifuged at  $400 \times g$  for 3 min and the supernatant, including the floating adipocytes, was removed. Cells were washed with PBS, passed through a 40- $\mu$ M cell strainer, and centrifuged again. Cells were then resuspended in Tri Reagent for collection of RNA (Passage 0), or resuspended in EGM-2V media, grown in 6-well plates for a single passage (2-4 days) and then harvested for RNA. *Gpihbp1* and *Cd31* expression levels were measured by quantitative RT-PCR (mean  $\pm$  standard error), and *Gpihbp1* expression was normalized to *Cd31* expression.

# Figure S1

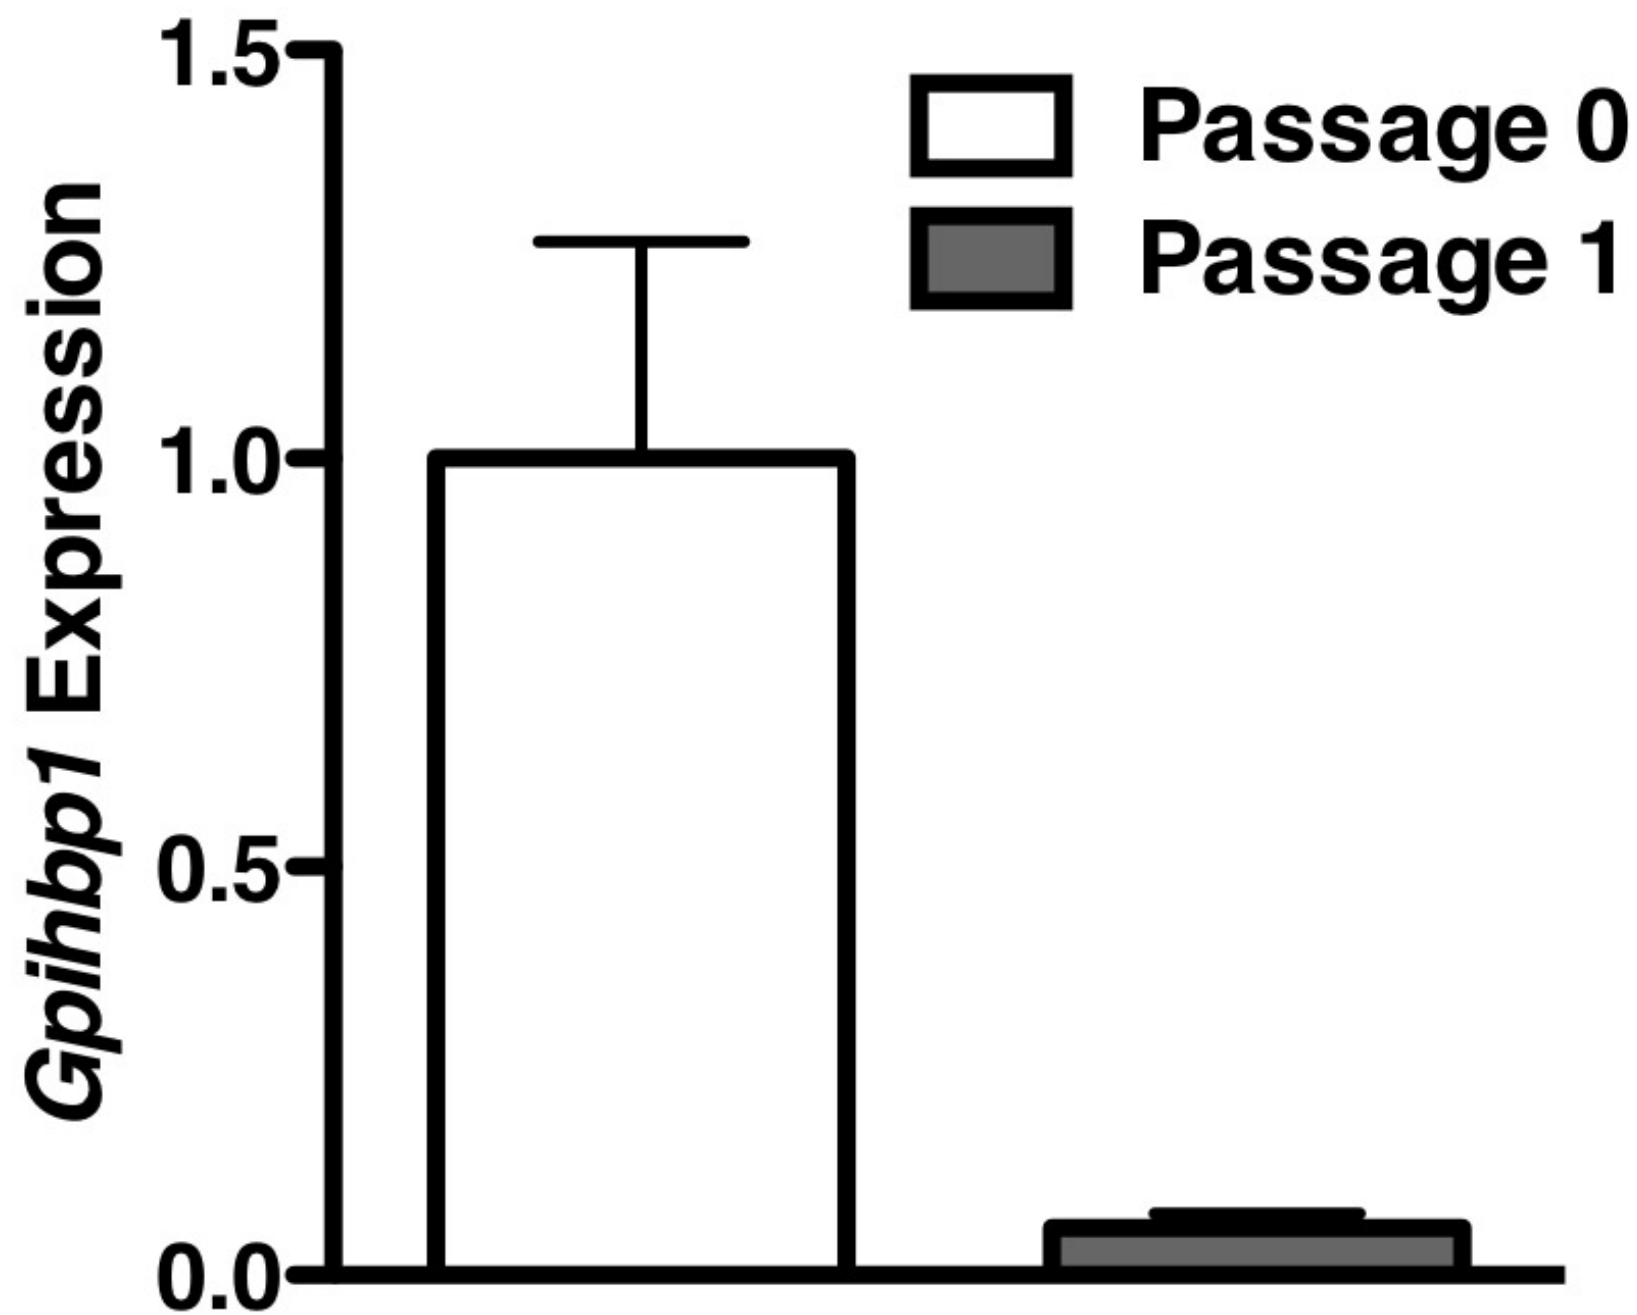

Supplement: me.2008-0146_1.pdf [file me.2008-0146_1.pdf]
